# Supplementary material for: Detection of Acute Brain Injury in Intensive Care Unit Patients on ECMO Support Using Ultra-Low-Field Portable MRI: A Retrospective Analysis Compared to Head CT
Source: MDPI journal article supplement (doi:10.3390/diagnostics14060606), 2024-03-13
Supplement: s1 [file s1]

**Supplemental Table S1.** Characteristics of the 9 patients with detectable acute brain injury and the respective findings of each imaging modality.

| Age | Gender | Race     | BMI   | Neurological Diagnosis                       | CT Read                                                                                                                                                                                               | ULF-pMR Read                                                                                                                                                                                                                                                                                                                                                                        |
|-----|--------|----------|-------|----------------------------------------------|-------------------------------------------------------------------------------------------------------------------------------------------------------------------------------------------------------|-------------------------------------------------------------------------------------------------------------------------------------------------------------------------------------------------------------------------------------------------------------------------------------------------------------------------------------------------------------------------------------|
| 58  | F      | White    | 35.46 | Ischemic Stroke (on MRI and IPH (on CT scan) | Multiple supratentorial brain parenchymal hemorrhage.                                                                                                                                                 | Possible right frontal lobe acute infarct diffusion image. Right parietal encephalomalacia from old infarct.                                                                                                                                                                                                                                                                        |
| 72  | M      | White    | 44.8  | Ischemic stroke (on MRI)                     | Increased effacement of the cerebral sulci bilaterally.                                                                                                                                               | T2 signal abnormality in occipital lobes and left temporal land parietal lobe with diffusion restriction.                                                                                                                                                                                                                                                                           |
| 52  | F      | White    | 43.7  | Ischemic stroke (on MRI)                     | No acute or subacute intracranial abnormalities.                                                                                                                                                      | Possible acute to subacute right frontal lobe infarct.                                                                                                                                                                                                                                                                                                                              |
| 58  | F      | White    | 27.86 | Ischemic stroke (on MRI and CT)              | Small infarct in the left cerebellar hemisphere.                                                                                                                                                      | Acute to subacute left lateral cerebellar infarct                                                                                                                                                                                                                                                                                                                                   |
| 54  | F      | Asian    | 18.12 | SAH (on MRI and CT)                          | Small volume_subarachnoid hemorrhage in the right superior frontal sulcus.                                                                                                                            | T2 FLAIR images show abnormal signal in the right superior frontal sulcus.                                                                                                                                                                                                                                                                                                          |
| 65  | M      | Black    | 34.86 | Both HIBI and Brain death (on MRI and CT)    | Loss of gray-white matter distinction in the cerebral and cerebellum, without effacement of the peripheral subarachnoid space. This is suggestive of early hypoxic ischemic insult.                   | Suspicious areas of cortical restricted diffusion in bilateral cerebral hemispheres.                                                                                                                                                                                                                                                                                                |
| 31  | F      | Hispanic | 20.89 | Both HIBI and Brain death (on MRI and CT)    | Complete loss of gray-white differentiation and effacement of the ventricles and basal cisterns compatible with extensive global ischemic brain injury,_cerebral edema and transtentorial herniation. | Bilateral cerebral cortex and deep gray matter DWI hyperintensity (which for the most part has corresponding ADC isointensity), with accentuated gray-white matter differentiation on T2/FLAIR images, correlate with the finding discussed on recent CT head exam, concerning for hypoxic ischemic injury. Diffuse cerebral edema and effacement of basal cisterns redemonstrated. |

|    |   |       |       |                                 |                                                                                                                                                                |                                                                                                                                                                                     |
|----|---|-------|-------|---------------------------------|----------------------------------------------------------------------------------------------------------------------------------------------------------------|-------------------------------------------------------------------------------------------------------------------------------------------------------------------------------------|
| 61 | M | White | 36.51 | Ischemic stroke (on MRI and CT) | Hypodensities with local mass effect in bilateral occipital lobes and left parietal lobe are suggestive of developing posterior circulation ischemic infarcts. | Evolving recent bilateral PCA territory infarcts and a small lacunar infarct in the left periventricular frontal lobe (lenticulostriate perforator territory).                      |
| 31 | F | Black | 34.69 | Ischemic stroke (on MRI)        | No acute intracranial abnormality.                                                                                                                             | Multiple acute embolic versus watershed infarcts in the bilateral superior frontal lobes, parietal lobes, parieto-occipital junctions and anterior aspect of right caudate nucleus. |

---

M: male, F: female, BMI: body mass index; IPH: intraparenchymal hemorrhage; SAH: subarachnoid hemorrhage
